# Supplementary material
Source: publisher site journal article supplement (https://www.spandidos-publications.com/8331/downloadSupplementary)
Supplement: Supplementary file 1 [file downloadSupplementary]

## Sheet: Sheet1
Table SI. Heterogeneity and inconsistency results.
Title	Researcher	Publication date	Heterogeneity assessment	Inconsistency assessment	Key findings	(Refs.)
Differential diagnosis of osteoblastic metastases from bone islands in patients with lung cancer by single-source dual-energy CT: Advantages of spectral CT imaging	Y. Dong, S. Zheng, H. Machida, B. Wang, A. Liu, Y. Liu and X. Zhang	2015	Statistical: SD of CT values, spectral curve slope, material densities.	Not explicitly assessed; high AUC (0.972) suggests consistency.	Spectral CT effectively differentiates lesions (sensitivity: 93.0%, specificity: 93.3%).	(30)
Deep neural network based artificial intelligence assisted diagnosis of bone scintigraphy for cancer bone metastasis	Z. Zhao, Y. Pi, L. Jiang, Y. Xiang, J. Wei, P. Yang, et al.	2020	Statistical: AUC across cancer types (0.955–0.988).	Low inconsistency; AUC consistently high across subgroups.	AI model improved radiologists' sensitivity (85% → 93.5%).	(31)
Automatic identification of suspicious bone metastatic lesions in bone scintigraphy using convolutional neural network	Y. Liu, P. Yang, Y. Pi, L. Jiang, X. Zhong, J. Cheng, et al.	2021	Statistical: Dice scores (0.856), IoU (0.789) by lesion burden.	Moderate inconsistency; AUC higher for prostate (0.900) vs. lung (0.870).	CNN achieved 81.2% accuracy; best in extensive lesion group (82.8%).	(32)
Deep learning-based algorithm improves radiologists’ performance in lung cancer bone metastases detection on computed tomography	T. Huo, Y. Xie, Y. Fang, Z. Wang, P. Liu, Y. Duan, et al.	2023	Statistical: Dice (0.856), IoU (0.789).	Low inconsistency; stable performance across cohorts (AUC: 0.875).	DCNN improved junior radiologists' sensitivity (68.0% → 90.2%).	(33)
CT-based radiomics and clinical characteristics for predicting bone metastasis in lung adenocarcinoma patients	Q. Su, B. Wang, J. Guo, P. Nie and W. Xu	2024	Statistical: AUC for clinical (0.824), radiomics (0.842), combined models (0.866).	Moderate inconsistency; Delong test showed significant differences between models.	Combined model (clinical + radiomics) performed best (AUC: 0.866).	(15)
Automated Diagnosis of Bone Metastasis by Classifying Bone Scintigrams Using a Self-defined Deep Learning Model	Y. Wang, Q. Lin, S. Zhao, X. Zeng, B. Zheng, Y. Cao and Z. Man	2024	Statistical: Accuracy (0.8038), AUC (0.8489) for bladder-excluded images.	Low inconsistency; stable performance after bladder removal and view fusion.	CNN model achieved best performance with bladder removal (AUC: 0.8489).	(34)
CI, confidence interval; CT, computed tomography; SD, standard deviation; AUC, area under the curve; CNN, convolutional neural network; DCNN, deep CNN; Dice, Dice similarity coefficient.
